# Supplementary material for: Efficacy of the CO Tracer Technique in Partitioning Biogenic and Anthropogenic Atmospheric CO2 Signals in the Humid Subtropical Eastern Highland Rim City of Cookeville, Tennessee
Source: MDPI journal article supplement (doi:10.3390/atmos14020208), 2023-01-19
Supplement: s1 [file s1]

Archive with 1 entries (1 files):
- atmosphere-2139790-supplementary.pdf
